# Supplementary material for: Open-source insect camera trap with vibrational detection and luring for monitoring Stictocephala basalis (Walker, Hemiptera: Membracidae: Smiliinae)
Source: PubMed Central journal article supplement (PMC11626055; doi:10.1016/j.ohx.2024.e00604), 2024-11-15
Supplement: mmc1.pdf [file mmc1.pdf]

## **Pied Piper Design Files**

Design files for Pied Piper can be found on Zenodo:  
<https://zenodo.org/records/10810501>
